# Supplementary material
Source: publisher figshare collection journal article supplement (https://aacr.figshare.com/articles/dataset/_/22490765)
Supplement: Supplementary file 1 [file 39942398]

# Supplemental Fig. 1.

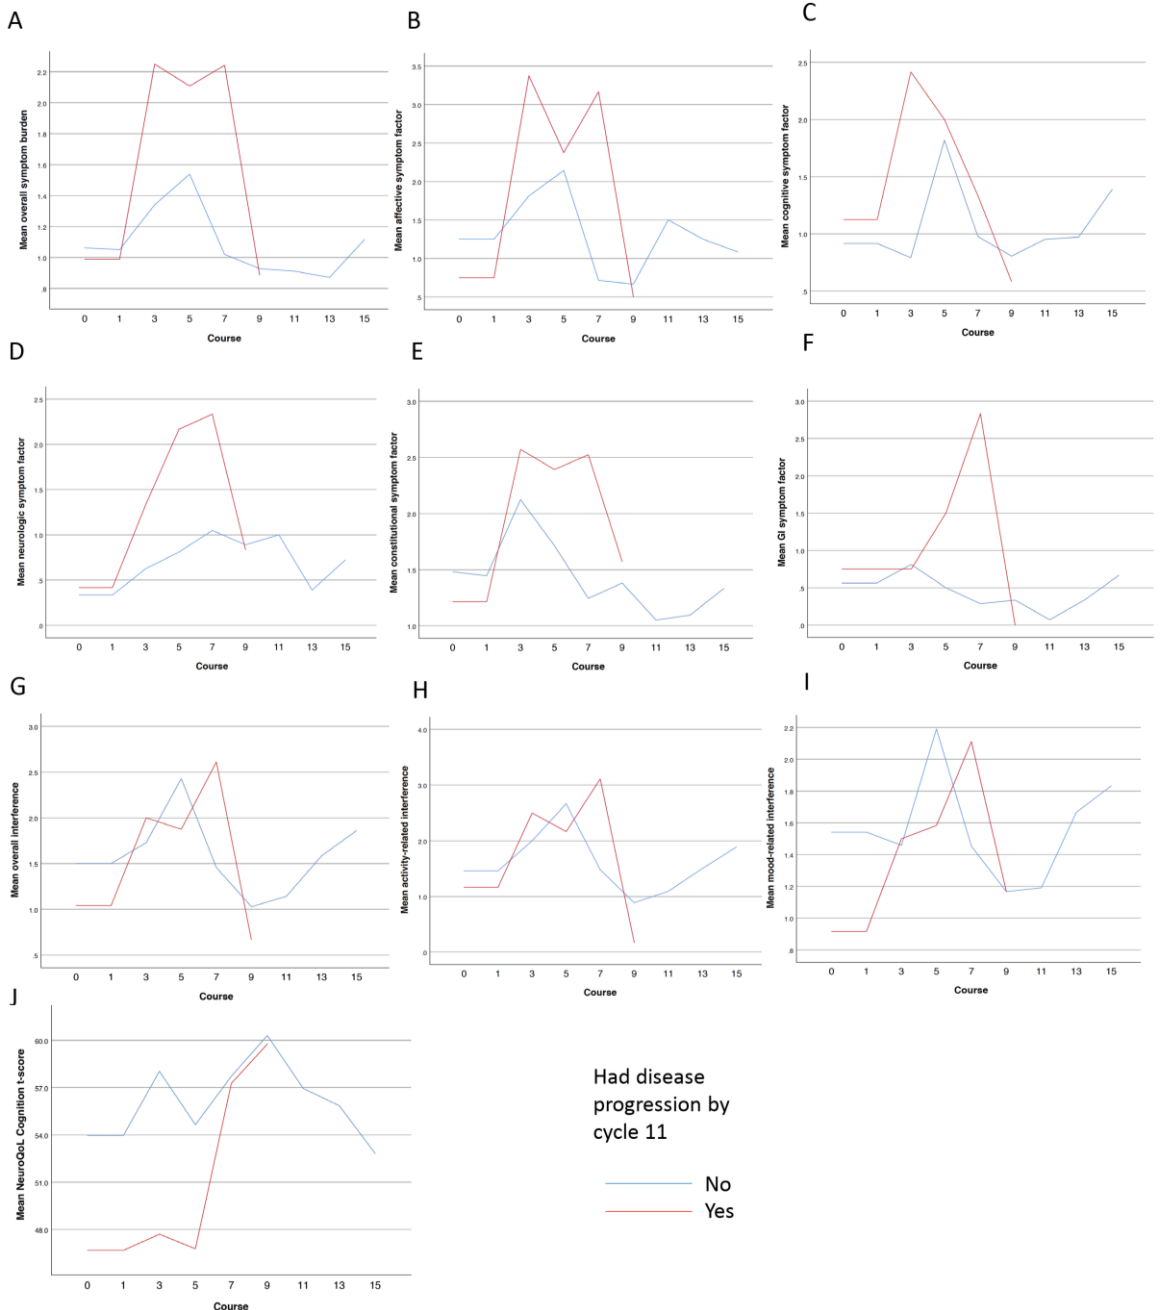

**Supplemental Fig. 1. Neurocognitive assessments comparing patients presenting progression versus no progression.** Symptom reports and neurocognitive reports comparing patients presenting progression versus no progression. Plots show the mean severity across treatment cycles through cycle 11 for overall symptom (a), mean overall interference (g), symptom factors (b-f), interference subscales (h-i) (0-10 scale), and NeuroQOL Cognitive Function (j) (0-100 scale). Course denotes cycle number. For MDASI-BT lower scores indicate better outcomes. For NeuroQOL higher scores indicate better outcomes.
